# Supplementary material for: Refractory phenotype of Aspergillus-sensitized asthma with bronchiectasis and allergic bronchopulmonary aspergillosis
Source: PubMed Central journal article supplement (PMC11629325; doi:10.1016/j.jacig.2024.100364), 2024-11-01

A

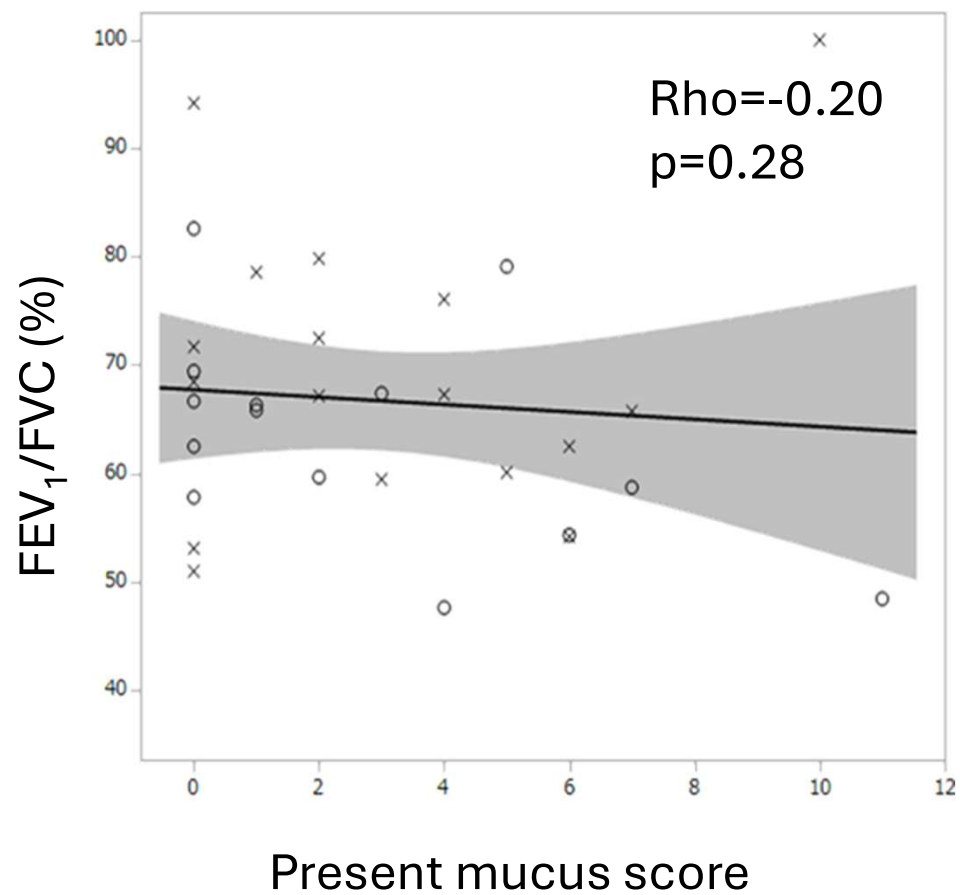

B

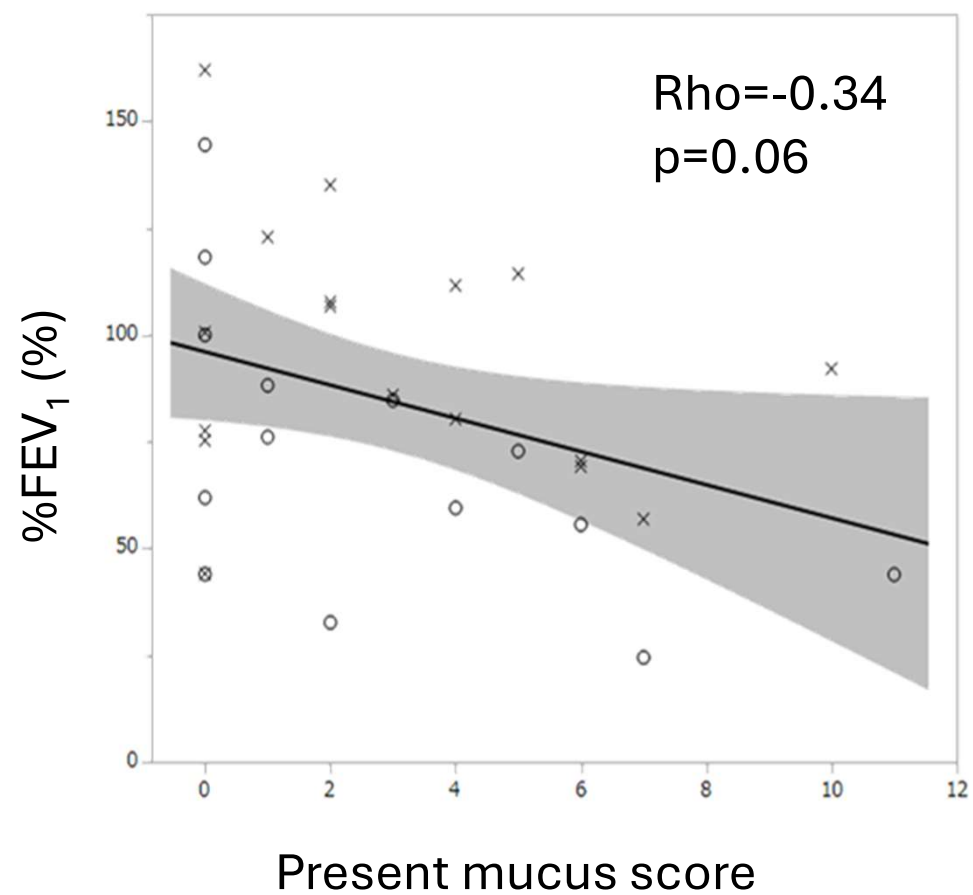

Supplement: mmc2.pdf [file mmc2.pdf]
