# Supplementary material for: Refractory phenotype of Aspergillus-sensitized asthma with bronchiectasis and allergic bronchopulmonary aspergillosis
Source: PubMed Central journal article supplement (PMC11629325; doi:10.1016/j.jacig.2024.100364), 2024-11-01
Supplement: mmc3.pdf [file mmc3.pdf]

**Clean Online Repository**

**Refractory phenotype of *Aspergillus*-sensitized asthma with bronchiectasis and allergic bronchopulmonary aspergillosis**

**Figure legends**

**FIGURE E1.** Relationships between present mucus scores and white blood cell (WBC) (A), neutrophil (B), eosinophil (C), and monocyte (D) counts. The circle indicates ABPA; the cross denotes *Af*sIgE<sup>+</sup>.

**FIGURE E2.** Relationships between present mucus scores and FEV<sub>1</sub>/FVC (A), and %FEV<sub>1</sub> (B). The circle indicates ABPA; the cross denotes *Af*sIgE<sup>+</sup>.

**TABLE E1. Comorbidities, symptoms, auscultation findings, and treatments**

|                                                     | ABPA     | N  | Non-ABPA                    |    |                             |    | P      |
|-----------------------------------------------------|----------|----|-----------------------------|----|-----------------------------|----|--------|
|                                                     |          |    | <i>Af</i> sIgE <sup>+</sup> |    | <i>Af</i> sIgE <sup>-</sup> |    |        |
|                                                     |          |    | N                           |    | N                           |    |        |
| <b>Comorbidities</b>                                |          |    |                             |    |                             |    |        |
| Chronic obstructive pulmonary disease, n (%)        | 1(2.6)   | 39 | 3(9.1)                      | 33 | 1(2.9)                      | 34 | 0.36   |
| Diffuse panbronchiolitis, n (%)                     | 0        | 37 | 7(21.2)*                    | 33 | 5(15.2)*                    | 33 | 0.02   |
| Neutrophilic sinusitis, n (%)                       | 6(15.4)  | 39 | 12(36.4)*                   | 33 | 11(33.3)                    | 33 | 0.09   |
| Eosinophilic sinusitis, n (%)                       | 3(7.9)   | 38 | 1(3.0)                      | 33 | 7(20.6)                     | 34 | 0.052  |
| Pollinosis, n (%)                                   | 2(5.4)   | 37 | 5(15.2)                     | 33 | 2(6.1)                      | 33 | 0.28   |
| Rheumatoid arthritis, n(%)                          | 2(5.1)   | 39 | 3(9.1)                      | 33 | 0                           | 33 | 0.22   |
| Diabetes mellitus, n (%)                            | 2(5.1)   | 39 | 3(9.1)                      | 33 | 4(11.8)                     | 34 | 0.59   |
| Gastroesophageal reflux disease, n (%)              | 0        | 37 | 3(9.1)                      | 33 | 1(3.0)                      | 33 | 0.14   |
| <b>Symptoms and auscultation findings</b>           |          |    |                             |    |                             |    |        |
| <b>Stable phase</b>                                 |          |    |                             |    |                             |    |        |
| Cough, n (%)                                        | 10(25.0) | 40 | 19(59.4)*                   | 32 | 19(54.3)*                   | 35 | 0.006  |
| Rhonchi/wheeze, n (%)                               | 3(7.9)   | 38 | 7(21.2)                     | 33 | 8(25.0)                     | 32 | 0.14   |
| Coarse crackles, n (%)                              | 1(2.6)   | 39 | 3(9.1)                      | 33 | 5(15.6)                     | 32 | 0.15   |
| <b>Exacerbation phase</b>                           |          |    |                             |    |                             |    |        |
| Cough, n (%)                                        | 33(82.5) | 40 | 31(91.2)                    | 34 | 30(81.1)                    | 37 | 0.44   |
| Rhonchi/wheeze, n (%)                               | 20(54.1) | 37 | 25(73.5)                    | 34 | 29(82.9)*                   | 35 | 0.02   |
| Coarse crackles, n (%)                              | 3(8.1)   | 37 | 8(23.5)                     | 34 | 16(45.7)*                   | 35 | 0.001  |
| <b>Treatments**</b>                                 |          |    |                             |    |                             |    |        |
| Inhaled CS use (current), n (%)                     | 38(90.5) | 42 | 32(94.1)                    | 34 | 33(91.7)                    | 36 | 0.84   |
| Inhaled CS dose (current), eq. fluticasone, µg/day  | 607(337) | 41 | 763(423)                    | 32 | 585(361)                    | 36 | 0.11   |
| Inhaled CS use (previous), n (%)                    | 22(53.7) | 41 | 26(81.3)*                   | 32 | 19(61.3)                    | 31 | 0.046  |
| Inhaled CS dose (previous), eq. fluticasone, µg/day | 319(367) | 41 | 598(473)*                   | 30 | 484(465)                    | 31 | 0.04   |
| Oral CS use, n (%)                                  | 32(78.1) | 41 | 14(41.2)*                   | 34 | 12(33.3)*                   | 36 | 0.0001 |
| Oral CS <sub>≥</sub> 5mg/day, n (%)                 | 26(65.0) | 40 | 7(22.6)*                    | 31 | 9(25.0)*                    | 36 | 0.0001 |
| Oral CS <sub>≥</sub> 10mg/day, n (%)                | 17(42.5) | 40 | 3(9.7)*                     | 31 | 2(5.6)*                     | 36 | <.0001 |
| LABA use, n (%)                                     | 33(82.5) | 40 | 30(88.2)                    | 34 | 36(97.3)                    | 37 | 0.11   |
| LAMA use, n (%)                                     | 10(25.0) | 40 | 20(58.8)*                   | 34 | 21(56.8)*                   | 37 | 0.004  |
| Macrolide therapy, n (%)                            | 15(37.5) | 40 | 20(58.8)                    | 34 | 24(64.9)*                   | 37 | 0.04   |
| Antifungal agent, n (%)                             | 17(40.5) | 42 | 1(2.9)*                     | 34 | 2(5.4)*                     | 37 | <.0001 |
| Biologics use, n (%)                                | 7(16.7)  | 42 | 13(38.2)*                   | 34 | 9(24.3)                     | 37 | 0.10   |
| Airway clearance, n (%)                             | 8(19.1)  | 39 | 14(41.2)                    | 34 | 20(54.1)*                   | 37 | 0.01   |

Data are shown mean (SD). P value in the last column demonstrates variance across the 3 groups. \*p<0.05 vs

ABPA.\*\* Previously or currently used medications are presented, if not otherwise specified. CS, corticosteroids;

LABA, long acting β<sub>2</sub> agonist; LAMA, long acting anti-muscarinic antagonist.

**TABLE E2.** Present data of the ABPA, *Af*sIgE<sup>+</sup>, and *Af*sIgE<sup>-</sup> groups

|                | ABPA                                       | N          | Non-ABPA                    |                       |                             |            | P  |        |
|----------------|--------------------------------------------|------------|-----------------------------|-----------------------|-----------------------------|------------|----|--------|
|                |                                            |            | <i>Af</i> sIgE <sup>+</sup> | N                     | <i>Af</i> sIgE <sup>-</sup> | N          |    |        |
| Blood test     | White blood cell, / $\mu$ L                | 7949(2860) | 38                          | 7854(3275)            | 35                          | 7248(2466) | 36 | 0.43   |
|                | Neutrophil, / $\mu$ L                      | 5188(2586) | 38                          | 5297(2945)            | 34                          | 4920(2555) | 34 | 0.70   |
|                | Monocyte, / $\mu$ L                        | 447(177)   | 38                          | 460(164)              | 35                          | 416(246)   | 36 | 0.16   |
|                | Eosinophil, / $\mu$ L                      | 482(447)   | 38                          | 473(611)              | 35                          | 325(408)*  | 35 | 0.04   |
|                | Basophil, / $\mu$ L                        | 59(70)     | 38                          | 60(63)                | 35                          | 36(32)     | 34 | 0.047  |
|                | Total IgE, IU/mL                           | 1890(2732) | 34                          | 813(840) <sup>†</sup> | 27                          | 283(566)*  | 25 | <.0001 |
|                | FEV <sub>1</sub> /Forced vital capacity, % | 68.0(13.3) | 27                          | 64.9(14.0)            | 30                          | 67.9(12.6) | 30 | 0.51   |
|                | %FEV <sub>1</sub> , %                      | 76.8(28.3) | 27                          | 84.3(31.1)            | 30                          | 87.6(29.3) | 30 | 0.39   |
|                | Exhaled nitric oxide, ppb                  | 54.5(59.5) | 17                          | 31.6(21.0)            | 29                          | 40.0(47.2) | 30 | 0.11   |
| Sputum culture |                                            |            |                             |                       |                             |            |    |        |
|                | <i>Aspergillus</i> spp.(+), n (%)          | 4(12.9)    | 31                          | 0                     | 30                          | 1(3.1)     | 32 | 0.06   |
|                | Fungus (+), n (%)                          | 5(16.1)    | 31                          | 0                     | 23                          | 1(3.1)     | 32 | 0.08   |
|                | <i>P. aeruginosa</i> (+), n (%)            | 7(22.6)    | 31                          | 4(13.3) <sup>†</sup>  | 30                          | 12(37.5)   | 32 | 0.08   |
|                | Gram negative bacteria (+), n (%)          | 9(29.0)    | 31                          | 15(50.0)              | 30                          | 17(53.1)   | 32 | 0.11   |
| Airway lesions |                                            |            |                             |                       |                             |            |    |        |
|                | mReiff score                               | 4.6(4.6)   | 38                          | 3.3(3.8)              | 35                          | 3.4(3.7)   | 38 | 0.40   |
|                | Number of bronchiolitis affected lobes     | 2.5(2.0)   | 38                          | 3.0(2.2)              | 35                          | 3.0(2.3)   | 37 | 0.59   |
|                | Mucus score                                | 3.6(3.7)   | 20                          | 3.0(2.8)              | 21                          | 4.0(3.6)   | 21 | 0.68   |

Data are shown mean (SD). P value in the last column demonstrates variance across the 3 groups.

\*p<0.05 vs ABPA, <sup>†</sup> p<0.05 vs *Af*sIgE<sup>-</sup> group. FEV<sub>1</sub>, forced expiratory volume in one second.

Table E3. Univariate analysis for associations between previous mucus score and previous clinical indices in all patients

| Variables             | Rho (p value) |
|-----------------------|---------------|
| White blood cells     | 0.51(0.001)   |
| Blood neutrophils     | 0.33(0.0503)  |
| eosinophils           | 0.30(0.08)    |
| monocytes             | 0.42(0.01)    |
| FEV <sub>1</sub> /FVC | -0.60(0.001)  |
| %FEV <sub>1</sub>     | -0.60(0.001)  |

**TABLE E4.** Present data for each cluster

|                                            |                                        | CL 1       | N  | CL 2       | N  | P     |
|--------------------------------------------|----------------------------------------|------------|----|------------|----|-------|
| Blood test                                 | White blood cell, / $\mu$ L            | 8744(3085) | 34 | 7033(3699) | 20 | 0.02  |
|                                            | Neutrophil, / $\mu$ L                  | 5795(2823) | 34 | 4867(3238) | 20 | 0.07  |
|                                            | Monocyte, / $\mu$ L                    | 510(179)   | 34 | 378(148)   | 20 | 0.007 |
|                                            | Eosinophil, / $\mu$ L                  | 602(613)   | 34 | 300(503)   | 20 | 0.002 |
|                                            | Basophil, / $\mu$ L                    | 62(42)     | 34 | 51(93)     | 20 | 0.006 |
|                                            | Total IgE, IU/mL                       | 1566(2654) | 31 | 1494(1829) | 16 | 0.65  |
| FEV <sub>1</sub> /Forced vital capacity, % |                                        | 63.8(14.2) | 24 | 69.5(13.3) | 19 | 0.27  |
| %FEV <sub>1</sub> , %                      |                                        | 69.6(27.3) | 24 | 94.4(30.4) | 19 | 0.004 |
| Exhaled nitric oxide, ppb                  |                                        | 30.5(16.9) | 21 | 42.6(39.6) | 15 | 0.46  |
| Sputum culture                             |                                        |            |    |            |    |       |
|                                            | <i>Aspergillus</i> spp.(+), n (%)      | 0          | 30 | 2(11.1)    | 18 | 0.14  |
|                                            | Fungus (+), n (%)                      | 1(3.3)     | 30 | 2(11.1)    | 18 | 0.55  |
|                                            | <i>P. aeruginosa</i> (+), n (%)        | 9(30.0)    | 30 | 1(5.6)     | 18 | 0.07  |
|                                            | Gram negative bacteria (+), n (%)      | 15(50.0)   | 30 | 5(27.8)    | 18 | 0.13  |
| Airway lesions                             |                                        |            |    |            |    |       |
|                                            | mReiff score                           | 4.6(4.8)   | 33 | 3.6(3.5)   | 21 | 0.68  |
|                                            | Number of bronchiolitis affected lobes | 3.2(2.1)   | 33 | 2.2(2.1)   | 21 | 0.09  |
|                                            | Mucus score                            | 4.8(3.4)   | 18 | 1.5(2.3)   | 16 | 0.002 |

Data are shown mean (SD). FEV<sub>1</sub>, forced expiratory volume in one second.
